# Supplementary material for: Sniffing the human body volatile hexadecanal blocks aggression in men but triggers aggression in women
Source: PubMed Central journal article supplement — Sci Adv. 2021 Nov 19;7(47):eabg1530. doi: 10.1126/sciadv.abg1530 (PMC8604408; doi:10.1126/sciadv.abg1530), 2021-11-19
Supplement: sciadv.abg1530_sm.pdf [file sciadv.abg1530_sm.pdf]

Supplementary Materials for  
**Sniffing the human body volatile hexadecanal blocks aggression in men  
but triggers aggression in women**

Eva Mishor\*, Daniel Amir, Tali Weiss, Danielle Honigstein, Aharon Weissbrod,  
Ethan Livne, Lior Gorodisky, Shiri Karagach, Aharon Ravia, Kobi Snitz, Diyala Karawani,  
Rotem Zirler, Reut Weissgross, Timna Soroka, Yaara Endevelt-Shapira, Shani Agron,  
Liron Rozenkrantz, Netta Reshef, Edna Furman-Haran, Heinz Breer, Joerg Strotmann,  
Tatsuya Uebi, Mamiko Ozaki, Noam Sobel\*

\*Corresponding author. Email: [eva.mishor@gmail.com](mailto:eva.mishor@gmail.com) (E.M.); [noam.sobel@weizmann.ac.il](mailto:noam.sobel@weizmann.ac.il) (N.S.)

Published 19 November 2021, *Sci. Adv.* 7, eabg1530 (2021)  
DOI: 10.1126/sciadv.abg1530

**This PDF file includes:**

Figs. S1 to S10  
Tables S1 and S2

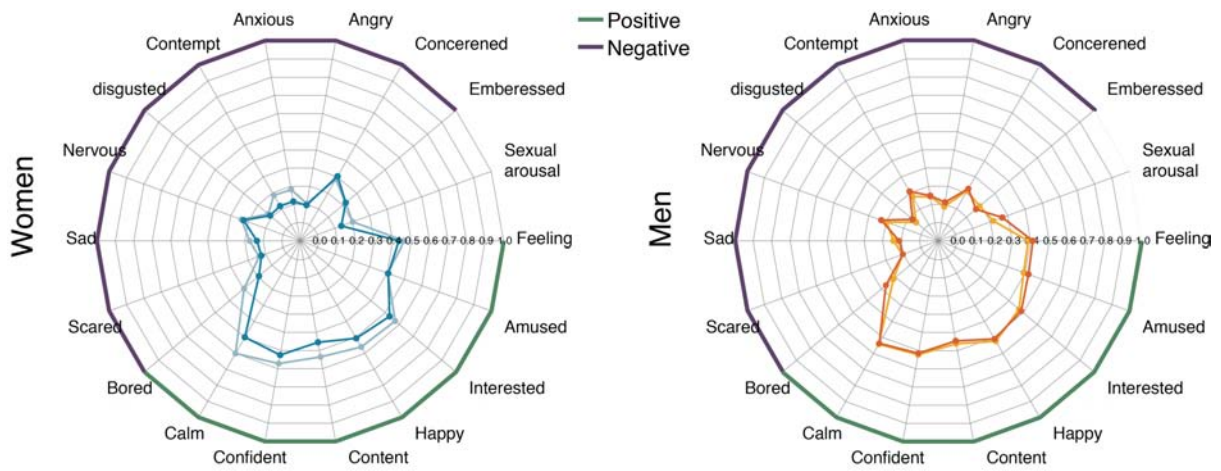

**Supplementary Figure 1. Participants' mood did not differ between groups prior to odor exposure**

Participants' mood prior to experiment was estimated using a 17-item mood scale. A linear mixed model with factors of Sex, Odor, Question, and random effects of Participant revealed an effect of Question ( $F(17) = 146.06$ ,  $p < 0.0001$ ), and a modest significant interaction of Sex x Question ( $F(17) = 1.74$ ,  $p = 0.03$ ) indicating no initial differences in mood within Sex groups.

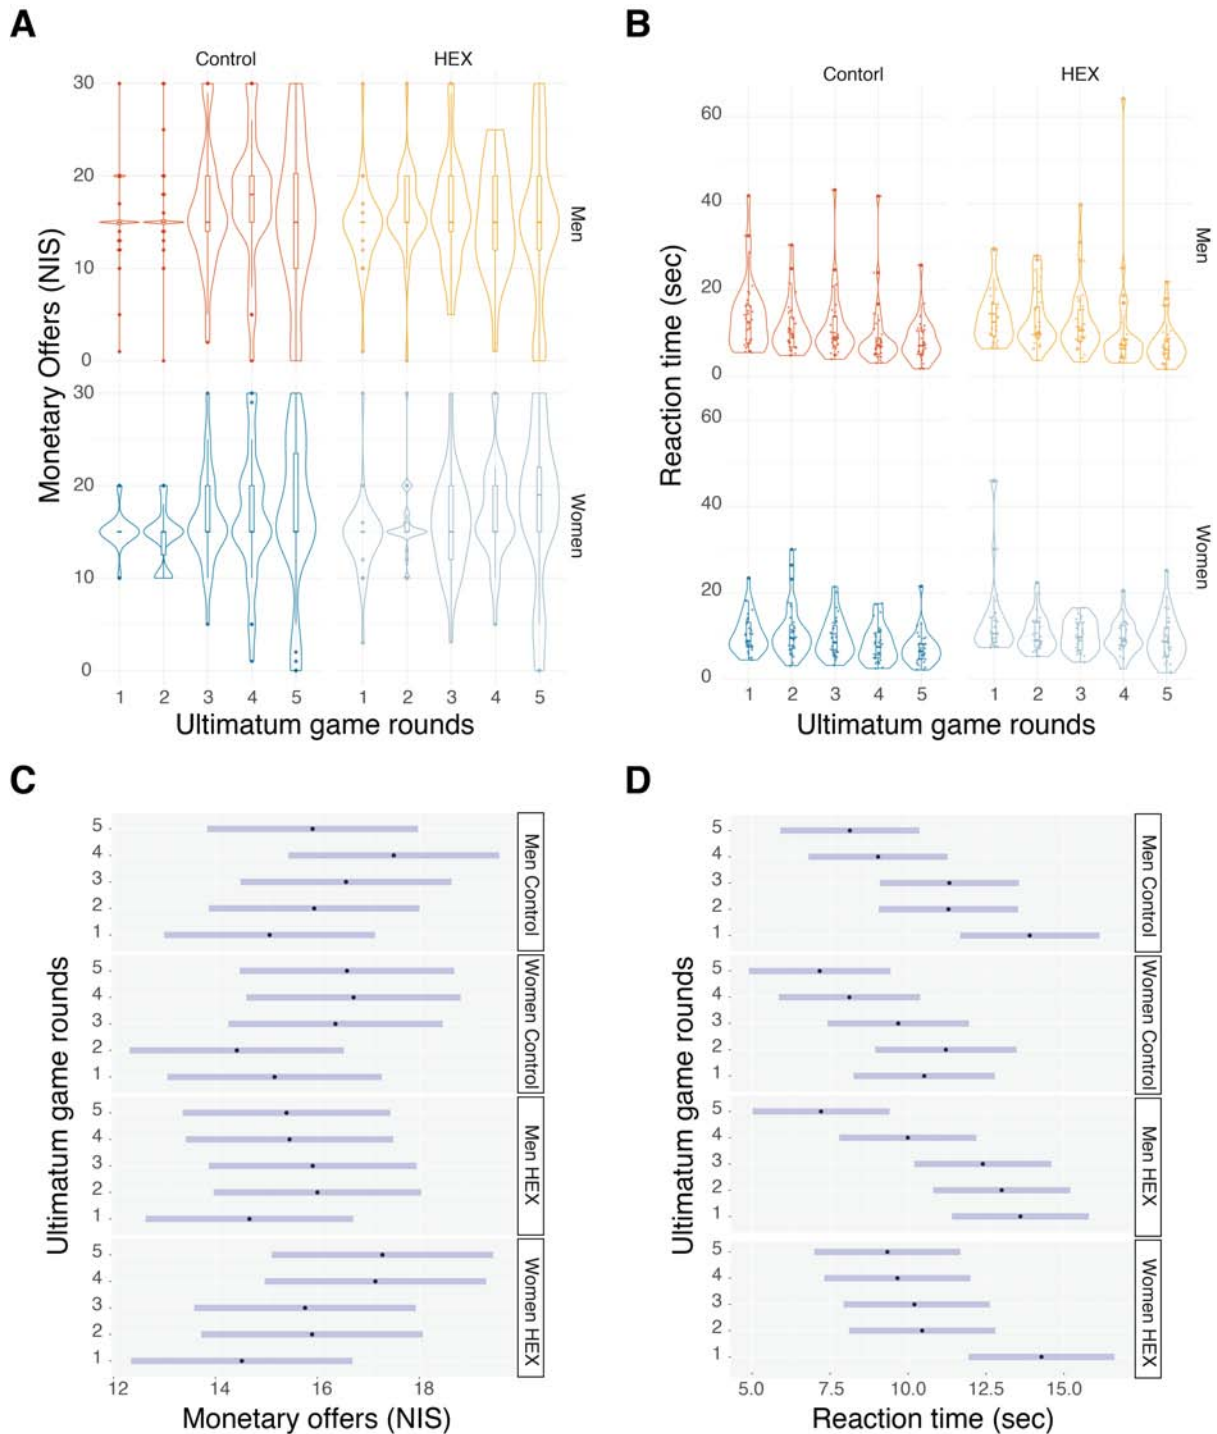

**Supplementary Figure 2. Participants' offers in the ultimatum game did not differ between groups**

(A) Participants' monetary offers were compared using a linear mixed model with factors of Odor, Sex, Round and random effects of Participant. There were no significant differences between groups (Sex:  $F(1) = 0.048$ ,  $p = 0.83$ ), Odor:  $F(1) = 0.13$ ,  $p = 0.72$ ), Round:  $F(4) = 2.32$ ,  $p = 0.06$ ), Sex x Odor:  $F(1) = 0.56$ ,  $p = 0.46$ , Sex x Round:  $F(1) = 0.71$ ,  $p = 0.59$ , Odor x Round:  $F(1) = 0.71$ ,  $p = 0.59$ , Odor x Round x Sex:  $F(1) = 0.71$ ,  $p = 0.59$ ). The outlined shape depicts the kernel probability density, the rectangle reflects the interquartile range (25th to the 75th percentiles) and the whiskers are no more than  $1.5 \times$  IQR of the upper and lower hinges.

Outlying points are plotted individually. **(B)** Linear mixed model with factors of Odor, Sex, Rounds, and random effects of Participant revealed no significant effect of Odor and Sex on reaction time standardized score (Sex:  $F(1) = 1.52$ ,  $p = 0.22$ , Odor:  $F(1) = 1.52$ ,  $p = 0.22$ , Sex  $\times$  Odor =  $0.90$ , Sex  $\times$  Odor  $\times$  Rounds:  $F(4) = 2.01$ ,  $p = 0.09$ ) and a significant effect of Round (Rounds:  $F(4) = 18.37$ ,  $p < 0.0001$ ), which looks like a drift towards shorter reaction times. This may imply that exposure to HEX did not reduce responsiveness or reduced participants' motor ability. The data is depicted as in (A), with the addition of the raw data-points. The differences between the group in both monetary offers and reaction times are better visualized using the **(C)** Mean + confidence intervals (CI) of 95% of monetary offers, and **(D)** Mean + CI of 95% of reaction times.

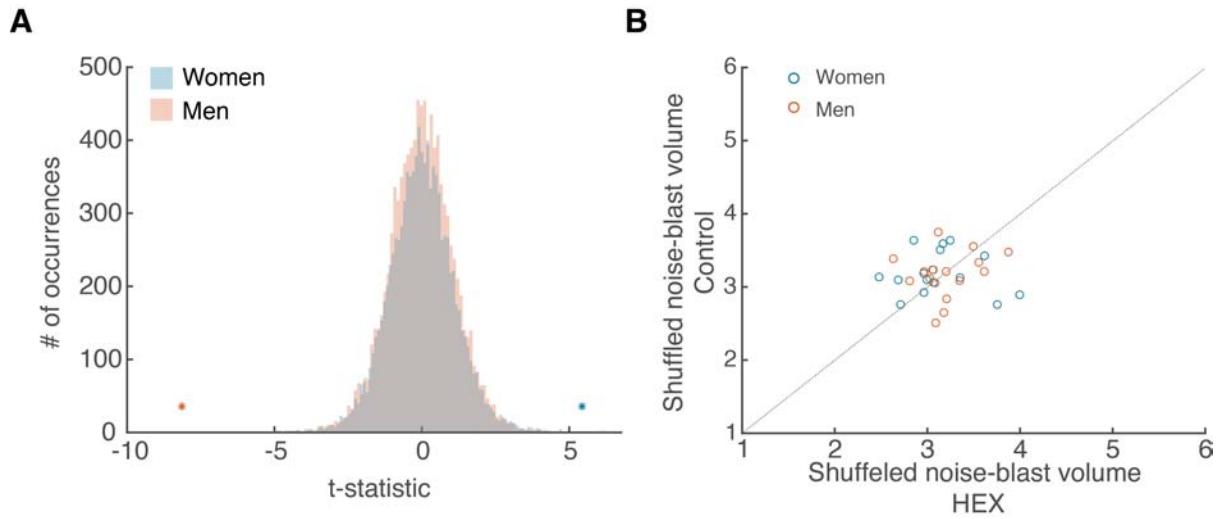

**Supplementary Figure 3. Validation of group differences using a permutation test**

(A) Distribution of t-statistics of shuffled data trial-by-trial comparisons. Asterisks denote the real data p-value, which is smaller than 99%. (B) Rendition of Fig. 2B using permuted data (see methods, Taylor Aggression Paradigm (TAP), Statistical analysis).

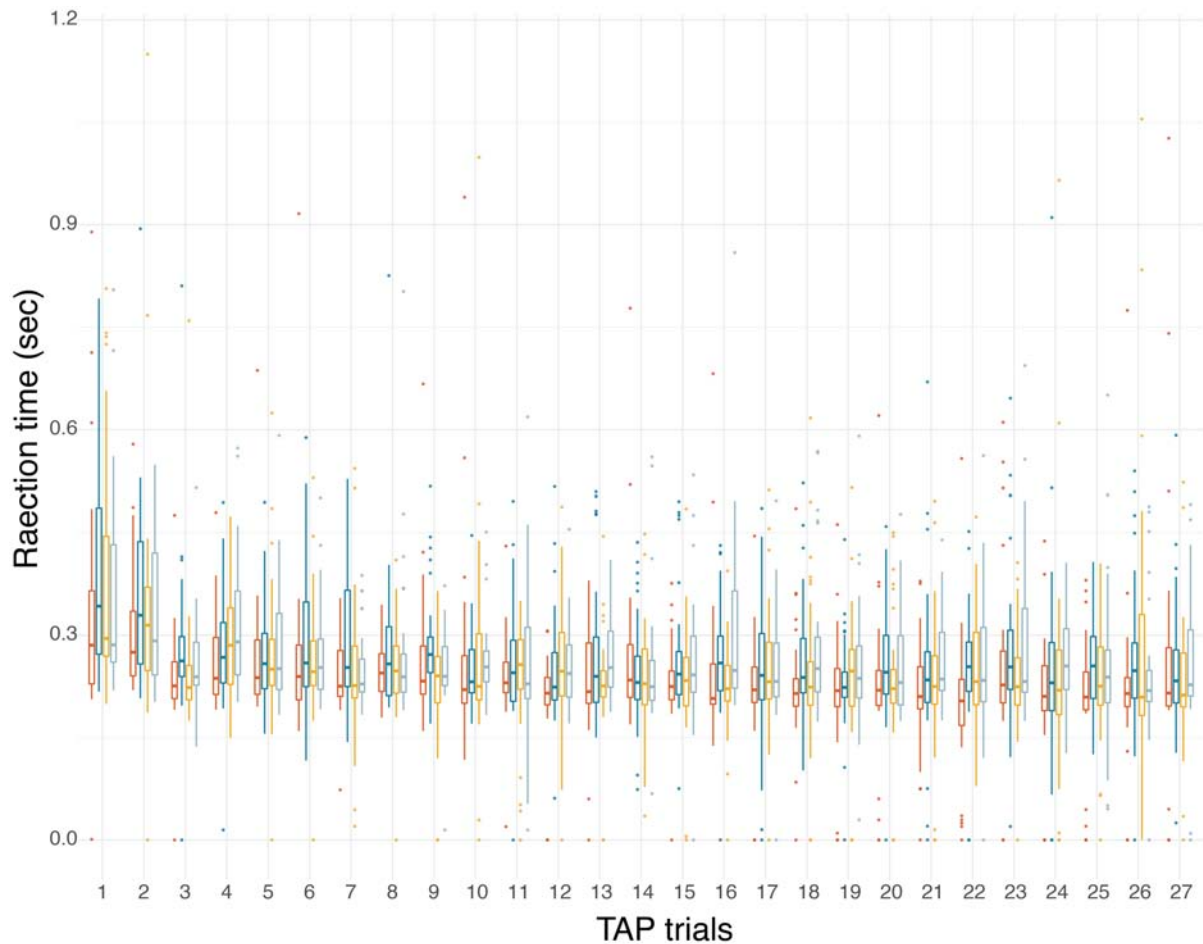

**Supplementary Figure 4. HEX does not affect vigilance in the TAP**

Linear mixed model with factor of Odor, Sex, Round and random effects of Participant revealed a significant difference between Rounds, but no other significant difference (Sex:  $F(1) = 0.02$ ,  $p = 0.87$ , Odor:  $F(1) = 0.38$ ,  $p = 0.54$ , Round:  $F(26) = 5.60$ ,  $p < 0.0001$ , Sex x Odor:  $F(1) = 0.20$ ,  $p = 0.65$ , Sex x Rounds:  $F(26) = 0.30$ ,  $p = 0.99$ , Odor x Rounds:  $F(26) = 1.10$ ,  $p = 0.33$ , Sex x Odor x Rounds:  $F(26) = 0.79$ ,  $p = 0.77$ ). This indicated that there was no motor/cognitive difference between the groups. The rectangle reflects the interquartile range (25th to the 75th percentiles) and the whiskers are no more than  $1.5 * IQR$  of the upper and lower hinges. Outlying points are plotted individually.

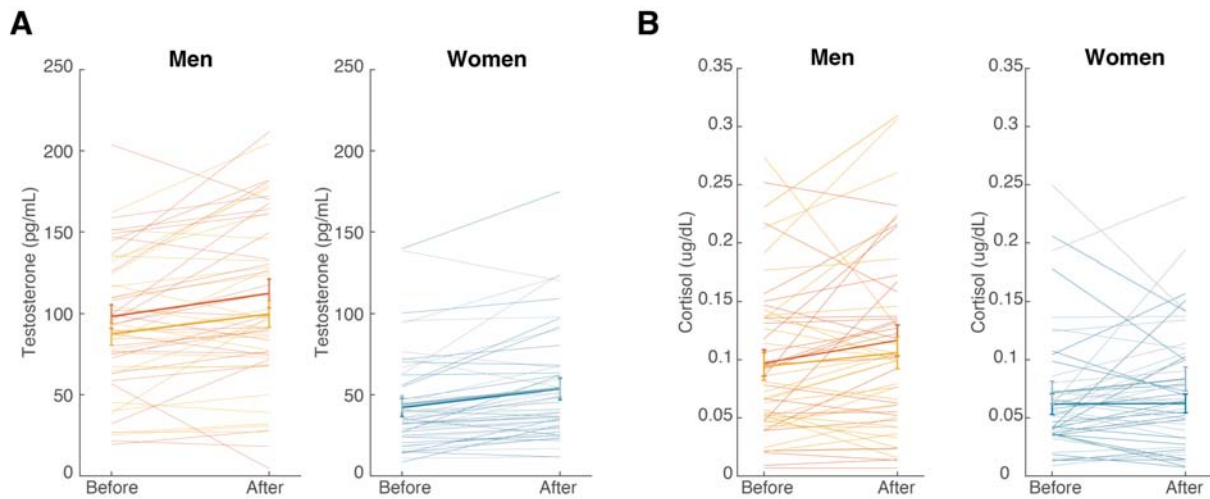

### Supplementary Figure 5. Salivary Testosterone and Cortisol levels did not differ between conditions

Salivary Cortisol (CORT) and Testosterone (T) were measured prior and after the experiment. Saliva was collected before exposure to odor and at the end of the experiment. Participants rinsed their mouth with water before first saliva collection and passively drooled into a salivette. Samples were stored at  $-20\text{C}^0$  and thawed and centrifuged prior to analysis using cortisol and testosterone kits (Cortisol Immunoassay kit, Testosterone Immunoassay kit, Salimetrics, CA, USA). After completion of the immunoassay, the absorbance of the fluorescent cortisol conjugate–antibody complex in the wells were obtained at 450 nm and corrected at 490 nm with a microplate reader. Standard dilutions of cortisol (0, 0.012, 0.037, 0.111, 0.333, 1.0 and 3.0  $\mu\text{g}/\text{dL}$ ) and testosterone (0, 6.1, 15.4, 38.4, 96, 240 and 600  $\text{pg}/\text{mL}$ ) were used along a nonspecific binding well in the first two columns of the kit for calibration. Defined high and low control concentrations were used as quality controls for each column of the plate. The absolute salivary cortisol and testosterone concentrations were estimated from the fluorescence of the hormone conjugate–antibody complex by computing the inverse value on a four-parameter sigmoid fit obtained with the standard values. For each subject, the delta of the two samples was computed.

(A) An ANOVA on the delta between before and after exposure to odor with a factor of Sex and Odor revealed a marginal difference between men and women’s initial T levels (Women control T before, mean  $\pm$  s.d.:  $42.18 \pm 31.05$ , Women Control T after:  $53.72 \pm 37.52$ . Women HEX T before:  $44.12 \pm 28.87$ , Women HEX T after:  $54.27 \pm 30.83$ . Men control T before, mean  $\pm$  s.d.:  $98.07 \pm 44.00$ , Men Control T after:  $113.00 \pm 53.54$ . Men HEX T before:  $87.58 \pm 39.71$ , Men HEX T after:  $99.80 \pm 47.71$ .  $F(1) = 3.7$   $p = 0.06$ ), but no effect of Odor ( $F(1) = 0.98$   $p = 0.32$ ) and no interaction ( $F(1) = 1.11$   $p = 0.30$ ) in T levels. (B) An ANOVA applied on the CORT delta revealed no effect of Odor (Women control CORT before, mean  $\pm$  s.d.:  $0.06 \pm 0.05$ , Women Control CORT after:  $0.06 \pm 0.05$ . Women HEX CORT before:  $0.07 \pm 0.05$ , Women HEX CORT after:  $0.08 \pm 0.06$ . Men control CORT before, mean  $\pm$  s.d.:  $0.10 \pm 0.07$ , Men Control CORT after:  $0.12 \pm 0.08$ . Men HEX CORT before:  $0.09 \pm 0.07$ , Men HEX CORT after:  $0.11 \pm 0.08$ .  $F(1) = 0.18$   $p = 0.67$ ), Sex ( $F(1) = 0.21$   $p = 0.65$ ), nor an interaction ( $F(1) = 0.35$   $p = 0.87$ ). This

might be due to the small group sizes for this kind of between-subject effects, given the inherent noise in measuring hormone levels.



**A**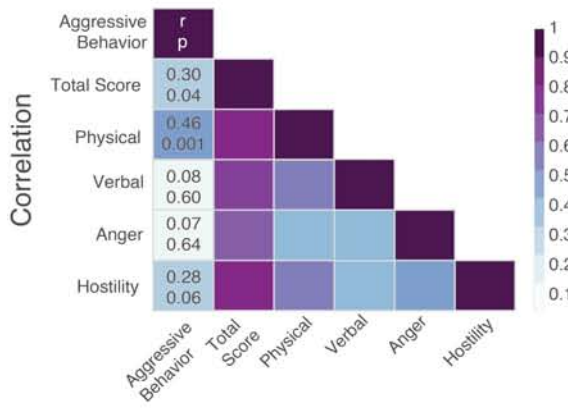**B**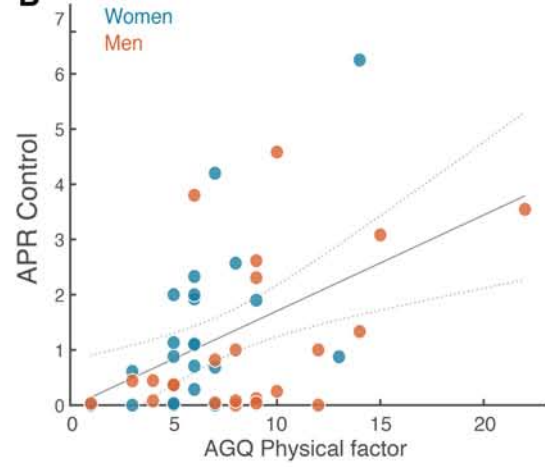**C**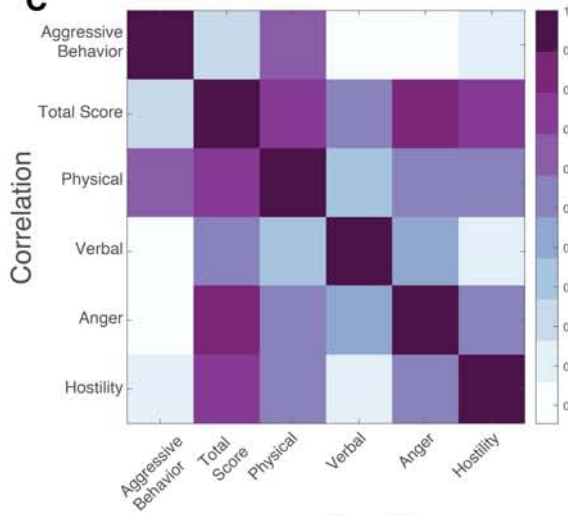**D**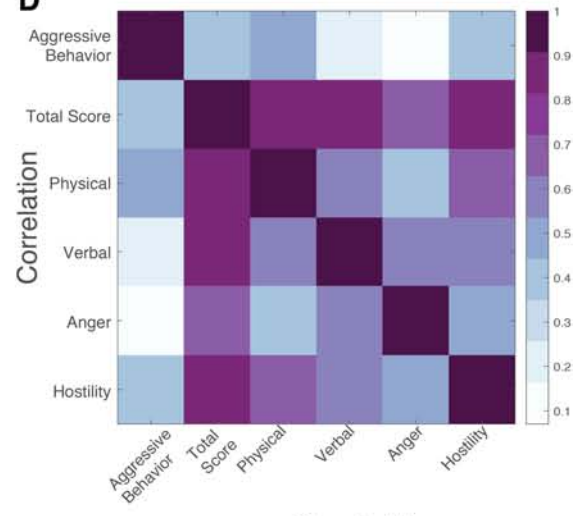**E**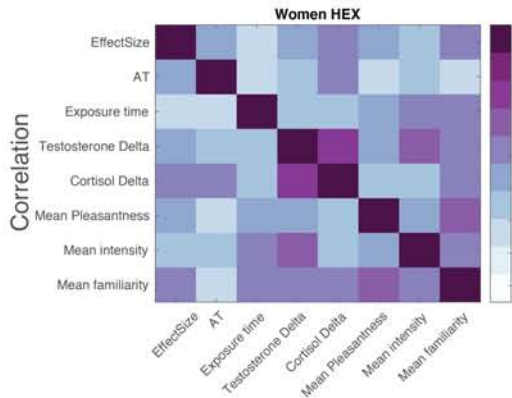**F**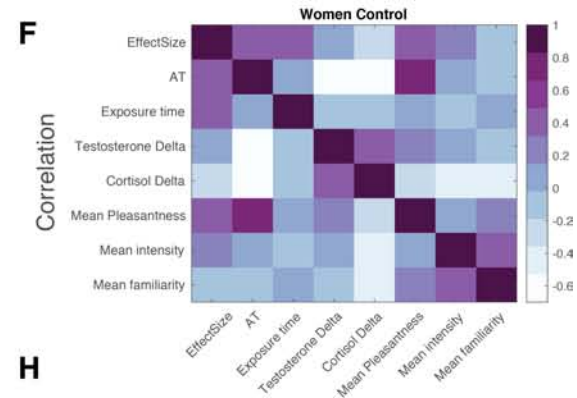**G**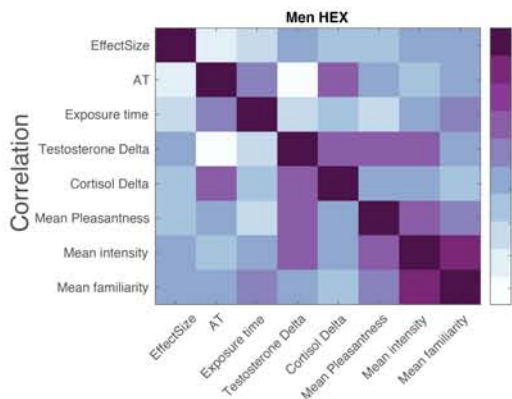**H**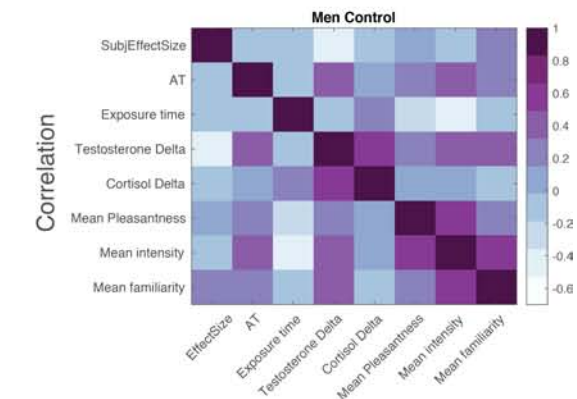

**Supplementary Figure 6. FC-PSAP captures trait aggression as measured by the Aggression Questionnaire (AGQ)**

(A) Pearson's correlation matrix of AGQ; total score and the different factors with APR in control condition. (B) Pearson's correlation of the physical aggression factor in the AGQ with APR in control condition.  $r = 0.47$ ,  $p = 0.001$ . The physical aggression factor usually correlated better than the total score of the AGQ in laboratory paradigms of aggression. The same correlation matrix, separated for women (C) and men (D), (E), (F), (G), (H) Participants' effect sizes computed for all participants using this equation:

$$participant\ effect\ size = \frac{\bar{X}_{participant} - \bar{X}_{group}}{SD_{pooled}}$$

(The pooled standard deviation is the pooled s.d. of both the control and HEX groups) do not correlate with intensity nor with pleasantness ratings.

| Subject | Sex | Agg HEX | Agg Control | Mon HEX | Mon Ctrl | Prov HEX | Prov Ctrl | None HEX | None Ctrl |
|---------|-----|---------|-------------|---------|----------|----------|-----------|----------|-----------|
| 1       | w   | 32      | 42          | 35      | 32       | 9        | 10        | 6        | 5         |
| 2       | m   | 0       | 4           | 54      | 49       | 17       | 15        | 4        | 6         |
| 3       | m   | 0       | 0           | 58      | 58       | 18       | 20        | 0        | 1         |
| 4       | m   | 6       | 8           | 52      | 59       | 14       | 18        | 6        | 1         |
| 5       | m   | 9       | 7           | 51      | 54       | 14       | 20        | 5        | 1         |
| 6       | m   | 2       | 2           | 55      | 57       | 18       | 17        | 4        | 0         |
| 7       | m   | 3       | 7           | 54      | 51       | 19       | 19        | 4        | 4         |
| 8       | w   | 1       | 0           | 56      | 56       | 20       | 18        | 1        | 3         |
| 9       | m   | 16      | 30          | 43      | 41       | 10       | 13        | 8        | 3         |
| 10      | w   | 11      | 12          | 55      | 50       | 17       | 17        | 0        | 3         |
| 11      | w   | 16      | 15          | 50      | 53       | 15       | 17        | 1        | 0         |
| 12      | w   | 5       | 0           | 54      | 58       | 17       | 17        | 2        | 1         |
| 13      | w   | 16      | 17          | 49      | 49       | 17       | 15        | 0        | 0         |
| 14      | m   | 31      | 37          | 42      | 37       | 17       | 12        | 4        | 1         |
| 15      | m   | 24      | 34          | 47      | 41       | 16       | 13        | 0        | 0         |
| 16      | m   | 34      | 39          | 44      | 41       | 12       | 11        | 3        | 0         |
| 17      | m   | 18      | 2           | 48      | 58       | 21       | 26        | 0        | 0         |
| 18      | w   | 15      | 11          | 45      | 46       | 20       | 18        | 7        | 12        |
| 19      | w   | 18      | 18          | 46      | 40       | 15       | 16        | 6        | 13        |
| 20      | w   | 0       | 0           | 58      | 57       | 26       | 28        | 0        | 2         |
| 21      | w   | 0       | 0           | 57      | 54       | 25       | 23        | 3        | 6         |
| 22      | w   | 11      | 7           | 69      | 73       | 12       | 8         | 2        | 1         |
| 23      | m   | 2       | 0           | 57      | 56       | 24       | 28        | 1        | 4         |
| 24      | w   | 48      | 36          | 32      | 41       | 11       | 14        | 0        | 2         |
| 25      | m   | 29      | 24          | 42      | 45       | 17       | 18        | 0        | 0         |
| 26      | m   | 0       | 3           | 69      | 62       | 10       | 21        | 9        | 0         |
| 27      | m   | 0       | 18          | 57      | 48       | 26       | 22        | 0        | 0         |
| 28      | w   | 32      | 25          | 40      | 50       | 15       | 13        | 3        | 2         |
| 29      | m   | 0       | 2           | 58      | 58       | 27       | 26        | 1        | 0         |
| 30      | w   | 12      | 6           | 57      | 72       | 20       | 10        | 0        | 0         |
| 31      | w   | 12      | 26          | 49      | 40       | 21       | 20        | 0        | 0         |
| 32      | m   | 0       | 1           | 56      | 56       | 27       | 25        | 3        | 3         |
| 33      | w   | 9       | 4           | 52      | 58       | 20       | 14        | 4        | 11        |
| 34      | m   | 21      | 15          | 33      | 26       | 12       | 6         | 6        | 0         |
| 35      | w   | 22      | 11          | 46      | 61       | 18       | 16        | 1        | 1         |
| 36      | m   | 34      | 55          | 25      | 29       | 10       | 12        | 22       | 0         |

|    |   |    |    |    |    |    |    |    |   |
|----|---|----|----|----|----|----|----|----|---|
| 37 | m | 4  | 11 | 56 | 53 | 26 | 25 | 0  | 0 |
| 38 | m | 14 | 22 | 52 | 45 | 22 | 22 | 0  | 0 |
| 39 | w | 37 | 30 | 37 | 38 | 13 | 15 | 0  | 5 |
| 40 | m | 0  | 1  | 57 | 58 | 26 | 27 | 1  | 0 |
| 41 | m | 21 | 22 | 50 | 49 | 20 | 22 | 0  | 1 |
| 42 | m | 0  | 1  | 57 | 57 | 27 | 26 | 2  | 1 |
| 43 | w | 49 | 35 | 32 | 37 | 7  | 15 | 2  | 3 |
| 44 | w | 2  | 1  | 57 | 56 | 25 | 28 | 0  | 2 |
| 45 | w | 38 | 28 | 34 | 41 | 10 | 14 | 3  | 5 |
| 46 | w | 42 | 50 | 34 | 28 | 11 | 8  | 0  | 1 |
| 47 | w | 13 | 17 | 39 | 51 | 13 | 21 | 25 | 4 |
| 48 | w | 29 | 25 | 40 | 52 | 15 | 13 | 2  | 0 |
| 49 | m | 26 | 23 | 50 | 61 | 8  | 6  | 5  | 0 |

**Supplementary Table 1. Number of events for each participant under HEX and under Control**

Participants had four types of events: Aggression, Monetary, Provocation, and None. Events were coded as None in the case that participants had a technical problem or that they chose not to respond. Mean number of aggressive events under HEX condition:  $M \pm s.d. = 15.59 \pm 14.28$ , Mean number of aggressive events under Control condition:  $M \pm s.d. = 16.00 \pm 14.71$ , Mean number of Monetary events under HEX  $M \pm s.d. = 48.76 \pm 9.66$ , Mean number of Monetary events under Control condition:  $M \pm s.d. = 49.84 \pm 10.40$ , Provocation HEX  $M \pm s.d. = 17.51 \pm 5.94$ , Mean number of None events under HEX condition:  $M \pm s.d. = 3.18 \pm 4.90$ , Mean number of None events under Control condition:  $M \pm s.d. = 2.20 \pm 3.10$ .

| Provocation > Baseline |                             |     |     |                                |
|------------------------|-----------------------------|-----|-----|--------------------------------|
| Z                      | Peak activation coordinates |     |     | Area                           |
|                        | x                           | y   | z   |                                |
| 8.75                   | -36                         | -52 | -17 | Fusiform, left                 |
| 8.09                   | -42                         | -58 | -10 | Occipital lobe, left           |
| 8.02                   | 38                          | -56 | -13 | Fusiform, right                |
| 7.92                   | 37                          | -84 | -8  | Occipital lobe, right          |
| 7.56                   | 44                          | 12  | 28  | Inferior frontal gyrus, right  |
| 7.28                   | 33                          | -54 | 47  | Parietal cortex, right         |
| 6.89                   | 29                          | 19  | -15 | Orbitofrontal cortex, right    |
| 6.88                   | -34                         | 18  | -15 | Orbitofrontal cortex, left     |
| 6.86                   | -32                         | -58 | 48  | Parietal cortex, left          |
| 6.42                   | -2                          | -29 | -3  | Periaqueductal gray, left      |
| 6.33                   | -42                         | 3   | 26  | Inferior frontal gyrus, left   |
| 6.3                    | 2                           | -28 | -2  | Periaqueductal gray, right     |
| 5.74                   | 6                           | 17  | 49  | Pre SMA, right                 |
| 5.5                    | 2                           | -26 | -23 | Ventral tegmental area, right  |
| 5.25                   | 53                          | 4   | -14 | Superior temporal gyrus, right |
| 5.2                    | -32                         | 19  | 3   | Insula, left                   |
| 5.12                   | 33                          | 23  | 3   | Insula, right                  |
| 5.08                   | -1                          | -27 | -23 | Ventral tegmental area, left   |
| 4.63                   | 44                          | 21  | -25 | Temporal pole, right           |
| 4.6                    | 6                           | 34  | 23  | ACC, right                     |
| 4.46                   | 6                           | -8  | 1   | Thalamus, right                |
| 4.3                    | -7                          | -8  | -1  | Thalamus, left                 |
| 4.26                   | -6                          | 17  | 43  | Pre SMA, left                  |
| 4.05                   | -44                         | 6   | -20 | Temporal pole, left            |
| 3.85                   | 7                           | -59 | 53  | Precuneus, right               |
| 3.8                    | -6                          | 34  | 17  | ACC, left                      |
| 3.57                   | -51                         | 1   | -14 | Superior temporal gyrus, left  |
| 3.43                   | -8                          | -59 | 51  | Precuneus, left                |
| 3.99                   | -48                         | -70 | 26  | Angular gyrus, left            |

**Supplementary Table 2. Brain areas activated by provocation events compared to baseline**  
Coordinates and Z-statistics for all significant activation (cluster-corrected > 3.1) for the contrast Provocation > Baseline.

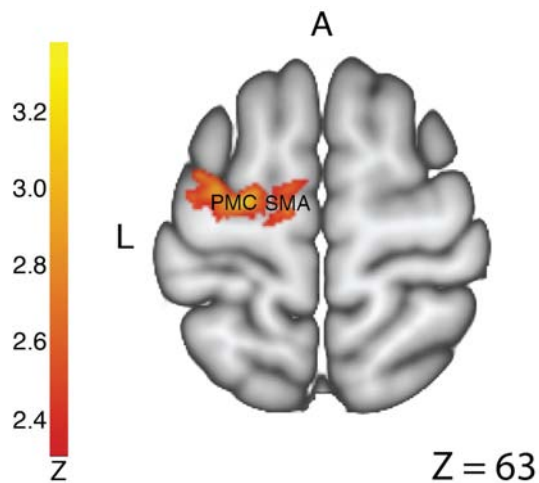

**Supplementary Figure 7. Pre-motor and supplementary motor areas functional connectivity with the AG was increased upon provocation when exposed to HEX**

PPI analysis with the AG as seed region revealed that the premotor cortex and supplementary motor area were more connected to the AG in both women and men for the contrast HEX>Control, Provocation>Baseline. Z statistic image was thresholded using clusters determined by  $Z > 2.3$  and a (corrected) cluster significance threshold of  $P = 0.05$  (as described in the methods section).

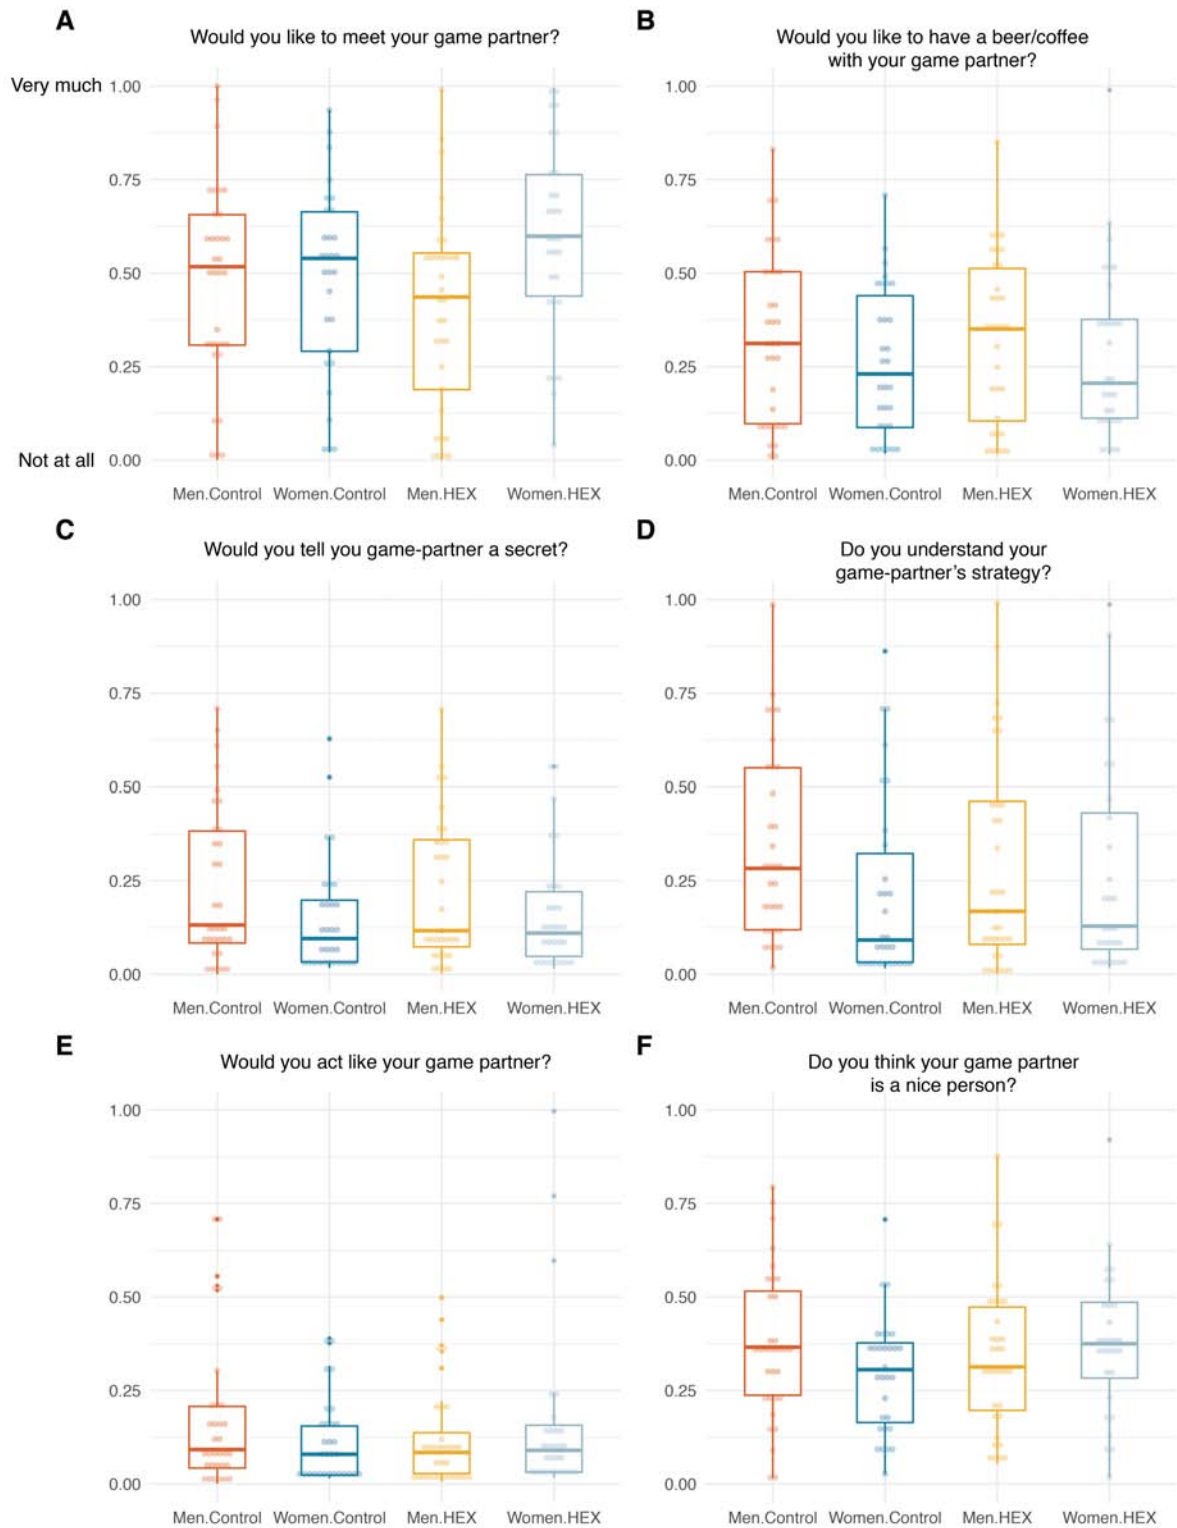

**Supplementary Fig. 8. Participants' attitudes towards their game-partner during the TAP**

(A) *Would you like to meet your game-partner?* Linear mixed model with factors of Odor, Sex, and random effects of Participant revealed a main effect of Sex ( $F(1) = 4.92, p = 0.03$ ), no effect of Odor ( $F(1) = 0.0009, p = 0.98$ ) and a trend for an Sex x Odor effect ( $F(1) = 3.20, p =$

0.08). Post-hoc analysis of the pairwise comparison revealed a significant difference between women and men in the HEX condition ( $t(121) = 2.83, p = 0.03$ ). **(B)** *Would you like to have a beer or coffee with your game-partner?* Linear mixed model with factors of Odor, Sex, and random effects of Participant revealed no effects (Sex:  $F(1) = 1.40, p = 0.24$ , Odor:  $F(1) = 0.03, p = 0.86$ , Sex x Odor:  $F(1) = 0.12, p = 0.73$ ). **(C)** *Would you tell your game-partner a secret?* Linear mixed model with factors of Odor, Sex, and random effects of Participant revealed a marginal effect of (Sex:  $F(1) = 3.79, p = 0.05$ , no effect of Odor:  $F(1) = 0.0004, p = 0.98$ , and no interaction Sex x Odor:  $F(1) = 0.40, p = 0.53$ ). **(D)** *Do you understand your game-partner's strategy?* Linear mixed model with factors of Odor, Sex and random effects of participant revealed no effects (Sex:  $F(1) = 1.34, p = 0.25$ , Odor:  $F(1) = 0.08, p = 0.77$ , Sex x Odor:  $F(1) = 1.34, p = 0.25$ ) **(E)** *Would you act like your game partner did?* Linear mixed model with factors of Odor, Sex, and random effects of Participant revealed no effects (Sex:  $F(1) = 0.07, p = 0.79$ , Odor:  $F(1) = 0.04, p = 0.85$ , Sex x Odor:  $F(1) = 2.69, p = 0.10$ ). **(F)** *Do you think your game-partner is a nice person?* Linear mixed model with factors of Odor, Sex, and random effects of Participant revealed no main effect of Sex ( $F(1) = 0.37, p = 0.54$ ), no effect of Odor ( $F(1) = 0.42, p = 0.52$ ) and a trend for an Sex x Odor effect ( $F(1) = 3.05, p = 0.08$ ).



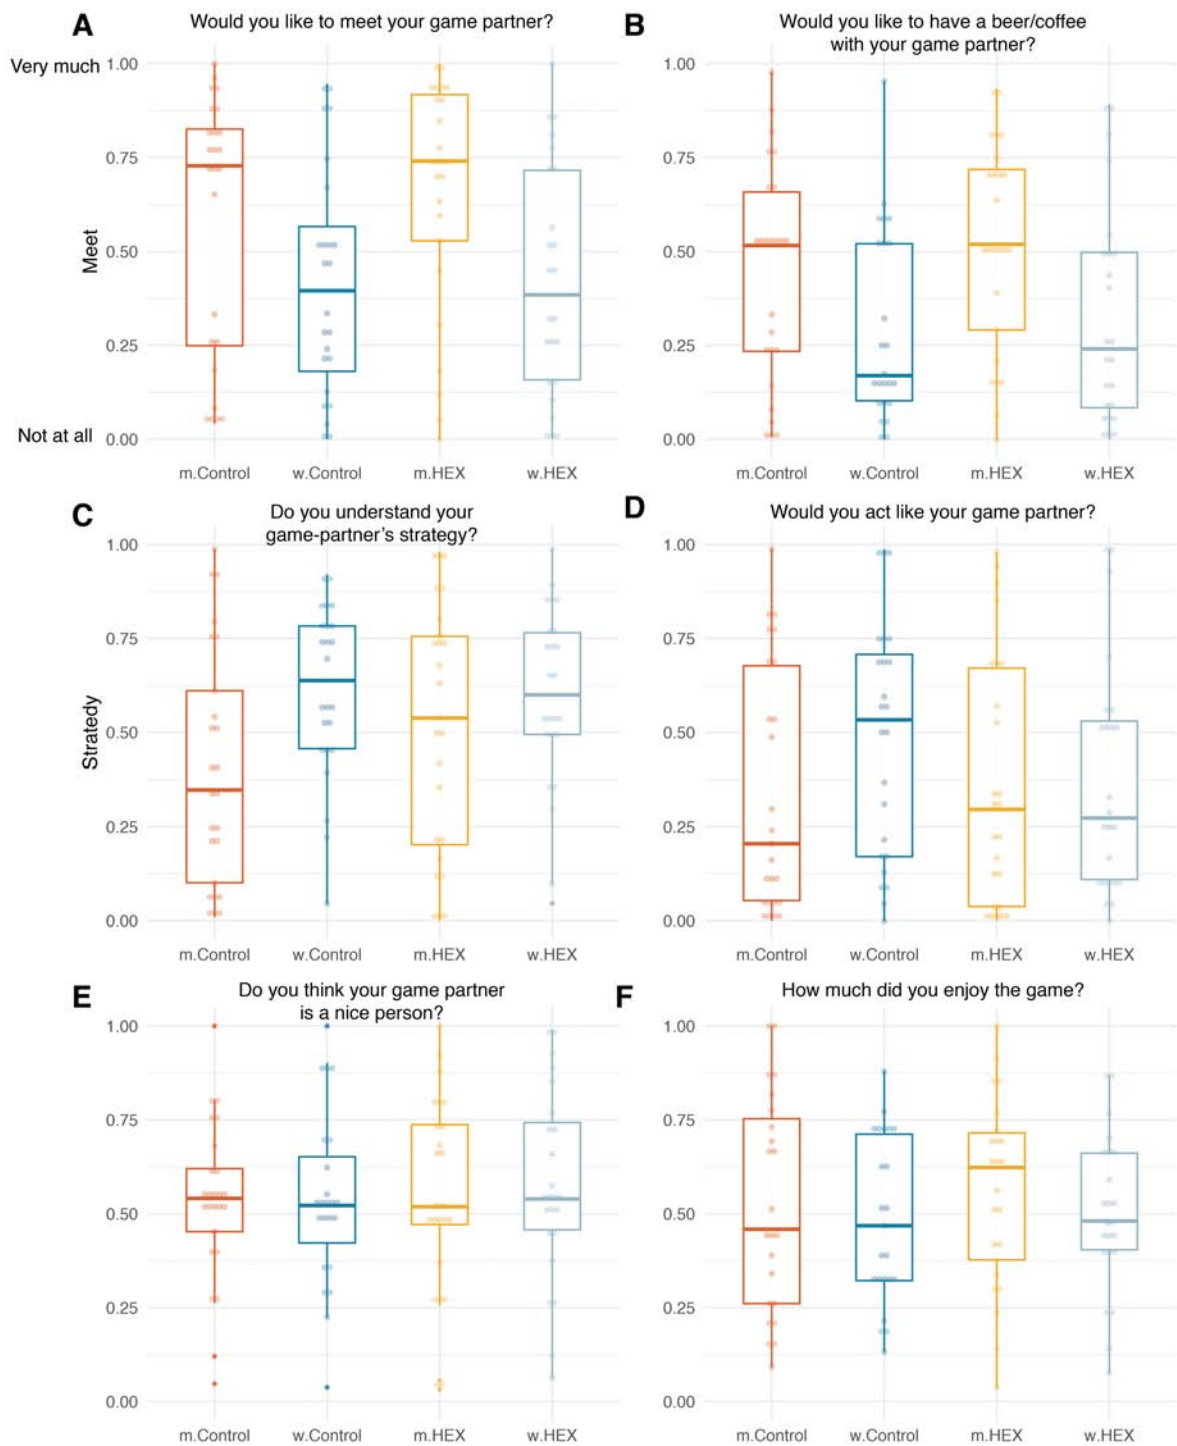

**Supplementary Fig. 9. Participants' attitudes towards their game-partner during the FC-PSAP**

**(A)** *Would you like to meet your game-partner?* Linear mixed model with factors of Odor, Sex, and random effects of Participant revealed a main effect of Sex ( $F(1) = 5.84, p = 0.02$ ), no effect of Odor ( $F(1) = 1.17, p = 0.28$ ) and no effect of the interaction Sex x Odor ( $F(1) = 0.77$ ).

**(B)** *Would you like to have a beer or coffee with your game-partner?* Linear mixed model with factors of Odor, Sex, and random effects of Participant revealed main effect of Sex:  $F(1) =$

5.89,  $p = 0.02$ , no effect of Odor:  $F(1) = 0.03$ ,  $p = 0.86$ , and no effect of the interaction Sex x Odor:  $F(1) = 0.12$ ,  $p = 0.73$ ). (C) *Do you understand your game-partner's strategy?* Linear mixed model with factors of Odor, Sex, and random effects of Participant revealed a marginal effect of Sex:  $F(1) = 3.82$ ,  $p = 0.06$ , no effect of Odor:  $F(1) = 1.88$ ,  $p = 0.18$ , and a trend towards interaction of Sex x Odor:  $F(1) = 3.14$ ,  $p = 0.08$ ). Post-hoc analysis of the pairwise comparison revealed a trend towards a difference between women and men in the Control condition ( $t(47) = 2.54$ ,  $p = 0.06$ ). (D) *Would you act like your game partner did?* Linear mixed model with factors of Odor, Sex, and random effects of Participant revealed no effects (Sex:  $F(1) = 0.80$ ,  $p = 0.38$ , Odor:  $F(1) = 1.16$ ,  $p = 0.29$ , Sex x Odor:  $F(1) = 2.58$ ,  $p = 0.11$ ). (E) *Do you think your game-partner is a nice person?* Linear mixed model with factors of Odor, Sex, and random effects of Participant revealed no effects (Sex:  $F(1) = 0.06$ ,  $p = 0.80$ , Odor:  $F(1) = 0.49$ ,  $p = 0.48$ , Sex x Odor:  $F(1) = 0.009$ ,  $p = 0.92$ ). (F) *How much did you enjoy the game?* Linear mixed model with factors of Odor, Sex, and random effects of Participant revealed no effects (Sex:  $F(1) = 0.72$ ,  $p = 0.40$ ), no effect of Odor ( $F(1) = 0.39$ ,  $p = 0.54$ , Sex x Odor ( $F(1) = 0.06$ ,  $p = 0.80$ )). The rectangle reflects the interquartile range (25th to the 75th percentiles) and the whiskers are no more than  $1.5 * IQR$  of the upper and lower hinges. Outlying points are plotted individually.

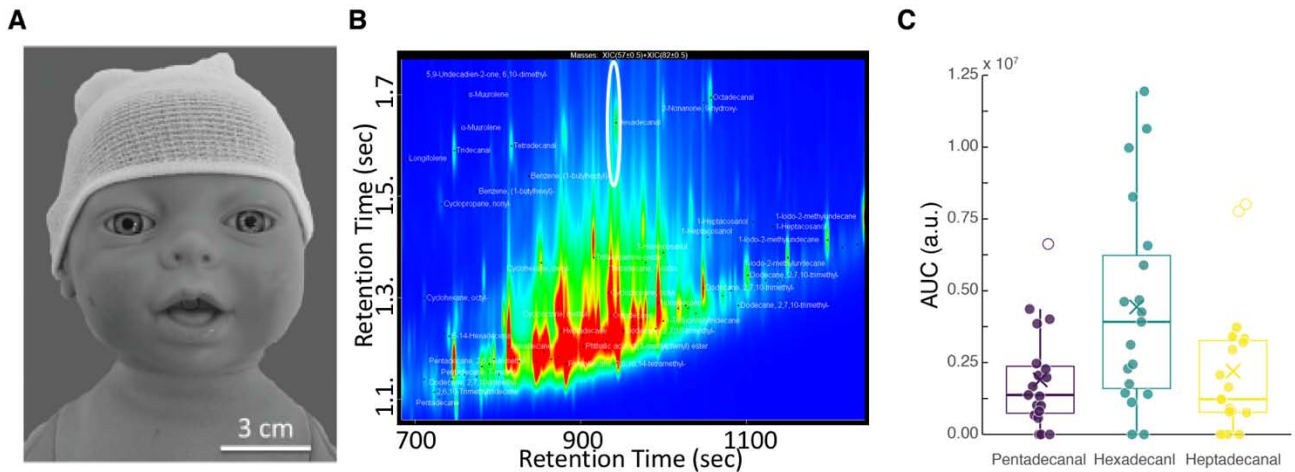

**Supplementary Figure 10: Hexadecanal is an abundant baby-head volatile**

(A) Baby-head volatiles were sampled exactly as in Uebi et al (2019) , from 19 babies (15 boys, age 1 to 4 days). (B) An example Contour plot of a two-dimensional gas chromatogram from baby #11. The HEX peak is highlighted with the white ellipse. (C) Peak area under the curve (AUC) for the three known OR37 ligands, pentadecanal, hexadecanal, and heptadecanal, in 19 babies. The area for HEX was near double that of the other ligands. Credit for computer image in A: Tatsuya Uebi and Mamiko Ozaki.
